# Supplementary material
Source: publisher figshare collection journal article supplement (https://sage.figshare.com/ndownloader/files/15254522)
Supplement: Supplementary file 1 [file 15254522]

## Supplementary Material

**Table S1. Examples of Mypage healthy behaviors counseling**

| Topic                                           | Example of the text                                                                                                                                                                                                                                                                                                                                                                                                                                                                                                         |
|-------------------------------------------------|-----------------------------------------------------------------------------------------------------------------------------------------------------------------------------------------------------------------------------------------------------------------------------------------------------------------------------------------------------------------------------------------------------------------------------------------------------------------------------------------------------------------------------|
| 1) Lifestyle habits                             | <ul style="list-style-type: none"><li>- In breast cancer patients, smoking can increase the risk of breast cancer on the contralateral side, as well as elevate cardiac toxicity and pulmonary toxicity.</li><li>- Excessive drinking may contribute to obesity. Moreover, drinking increases the risk of ovarian cancer and breast cancer on the contralateral side in breast cancer patients.</li><li>- You can burn 0.5 times more calories by sitting down as opposed to lying down when watching television.</li></ul> |
| 2) Diet                                         | <ul style="list-style-type: none"><li>- It is better to use chopsticks instead of a spoon during meals.</li></ul>                                                                                                                                                                                                                                                                                                                                                                                                           |
| Encourage patients to adopt a healthy diet      | <ul style="list-style-type: none"><li>- Try to have meals regularly.</li><li>- Try not to skip breakfast.</li><li>- During each meal, chew your food at least 10</li></ul>                                                                                                                                                                                                                                                                                                                                                  |
| Provide guidance for limiting calorie intake    | <ul style="list-style-type: none"><li>times and eat slowly over at least 30 minutes.</li><li>- Drink at least 2 liters of water every day.</li><li>- Only eat a half-bowl of rice for each meal.</li></ul>                                                                                                                                                                                                                                                                                                                  |
| Help to improve the types of nutrients consumed | <ul style="list-style-type: none"><li>- Only lightly dip your food in sauce instead of soaking it.</li><li>- Use small bowls or dishes for your food, and eat</li></ul>                                                                                                                                                                                                                                                                                                                                                     |
| Provide tips for a healthy meal when eating out | <ul style="list-style-type: none"><li>vegetables first.</li></ul>                                                                                                                                                                                                                                                                                                                                                                                                                                                           |

|                                                                             |                                                                                                                                                                                                                                                                                                                                                                                                                                                                                                  |
|-----------------------------------------------------------------------------|--------------------------------------------------------------------------------------------------------------------------------------------------------------------------------------------------------------------------------------------------------------------------------------------------------------------------------------------------------------------------------------------------------------------------------------------------------------------------------------------------|
|                                                                             | <ul style="list-style-type: none"> <li>- If you are still hungry after a meal, wait a little bit. If you're still hungry, try drinking green tea or water.</li> <li>- Do not watch television or read a newspaper while eating.</li> <li>- Do not go grocery shopping when you are hungry. You will likely buy foods on impulse. Make sure to make a list before grocery shopping so that you only buy things you need.</li> <li>- Here are some tips to eat healthy when dining out.</li> </ul> |
| 3) Exercise                                                                 | - Exercise is not only good for managing obesity but also helpful for changing your mood and improving sleep disorders and fatigue in breast cancer patients.                                                                                                                                                                                                                                                                                                                                    |
| Increase physical activity to the recommended level of 9 MET hours per week | <ul style="list-style-type: none"> <li>- Fast walking for more than 30 minutes 4-5 times a week is helpful.</li> <li>- One piece of wafer cookie is about 10-15 kcal, and you have to walk for about 3-4 minutes to burn this number of calories.</li> </ul>                                                                                                                                                                                                                                     |

**Table S2.** Comparison of Metabolic Risk Factors in the Control and Experimental Groups

| Characteristics          | Control group(n=30) | Experimental group (n=30) | t    | p     |
|--------------------------|---------------------|---------------------------|------|-------|
|                          | Mean $\pm$ SD       |                           |      |       |
| Body composition         |                     |                           |      |       |
| Weight (kg)              | 59.3 $\pm$ 9.5      | 60.7 $\pm$ 9.3            | 0.56 | 0.576 |
| Waist circumference (cm) | 85.7 $\pm$ 9.3      | 87.2 $\pm$ 8.9            | 0.65 | 0.520 |

|                                              |            |            |      |       |
|----------------------------------------------|------------|------------|------|-------|
| Blood pressure (mmHg)                        |            |            |      |       |
| Systolic                                     | 114.4±13.1 | 111.9±16.2 | 0.68 | 0.500 |
| Diastolic                                    | 74.2± 8.9  | 73.3±10.7  | 0.38 | 0.705 |
| Fasting blood glucose (mg/dL)                | 95.1±12.9  | 93.2±12.9  | 0.59 | 0.557 |
| Triglyceride (mg/dL)                         | 130.2±76.4 | 133.3±60.6 | 0.17 | 0.862 |
| Total cholesterol (mg/dL)                    | 202.8±38.7 | 206.1±41.9 | 0.31 | 0.755 |
| High density lipoprotein cholesterol (mg/dL) | 57.8±12.7  | 57.1±15.0  | 0.17 | 0.864 |
| Low density lipoprotein cholesterol (mg/dL)  | 126.3±34.8 | 129.8±38.2 | 0.37 | 0.712 |

---
